# Supplementary material for: Influence of radiosonde observations on the sharpness and altitude of the midlatitude tropopause in the ECMWF IFS
Source: Copernicus journal article supplement (doi:10.5194/wcd-5-491-2024), 2024-04-05
Supplement: Supplementary file 1 [file wcd-5-491-2024-supplement.pdf]

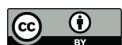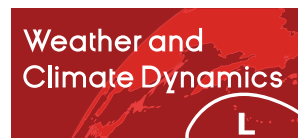

Open Access

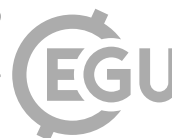

*Supplement of*

## **Influence of radiosonde observations on the sharpness and altitude of the midlatitude tropopause in the ECMWF IFS**

**Konstantin Krüger et al.**

*Correspondence to:* Konstantin Krüger ([konstantin.krueger@dlr.de](mailto:konstantin.krueger@dlr.de))

The copyright of individual parts of the supplement might differ from the article licence.

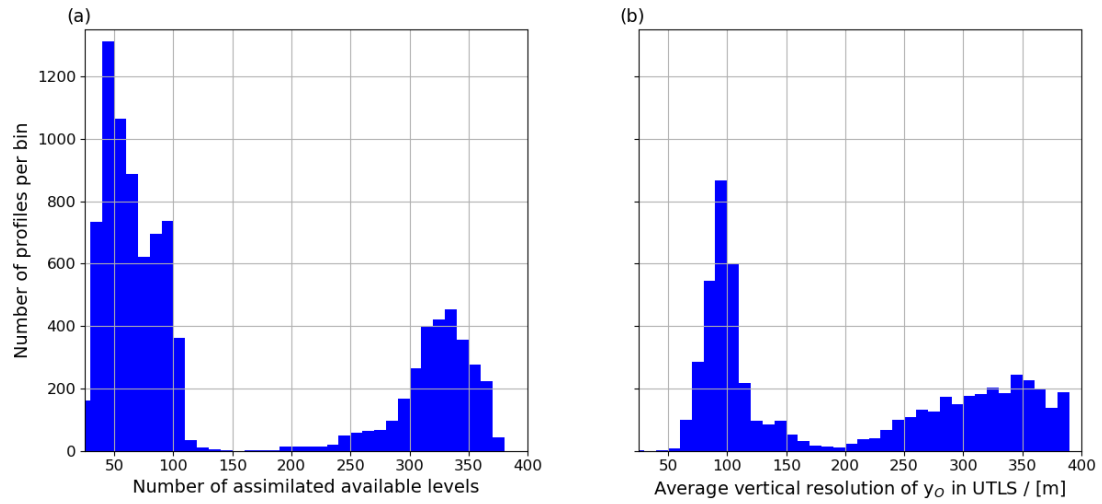

Figure S1: Histogram of (a) the number of vertical levels (b) the derived average vertical distance between two neighboured levels of the radiosonde observations as provided by the requested feedback files.

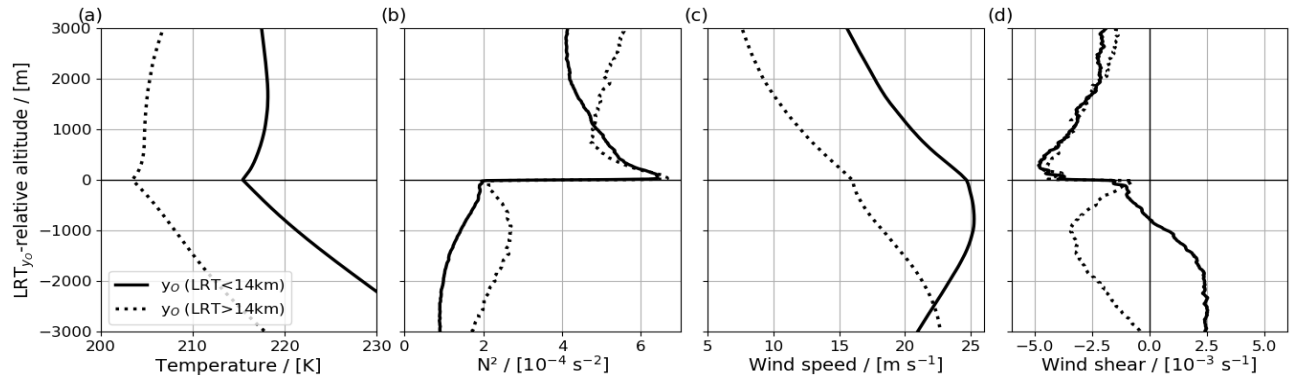

Figure S2: LRT<sub>yO</sub>-relative mean profiles of (a) temperature, (b)  $N^2$ , (c) wind speed, (d) wind shear for profiles associated with the mid-latitudes ( $LRT_{yO} < 14 \text{ km}$ ; solid) sub-tropics ( $LRT_{yO} > 14 \text{ km}$ ; dashed).

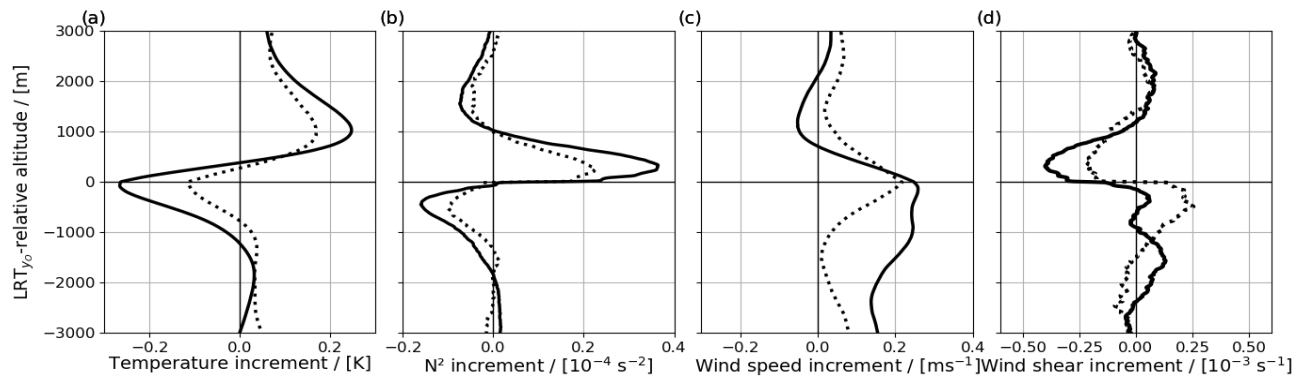

Figure S3: as in Fig. S2 but for increments.

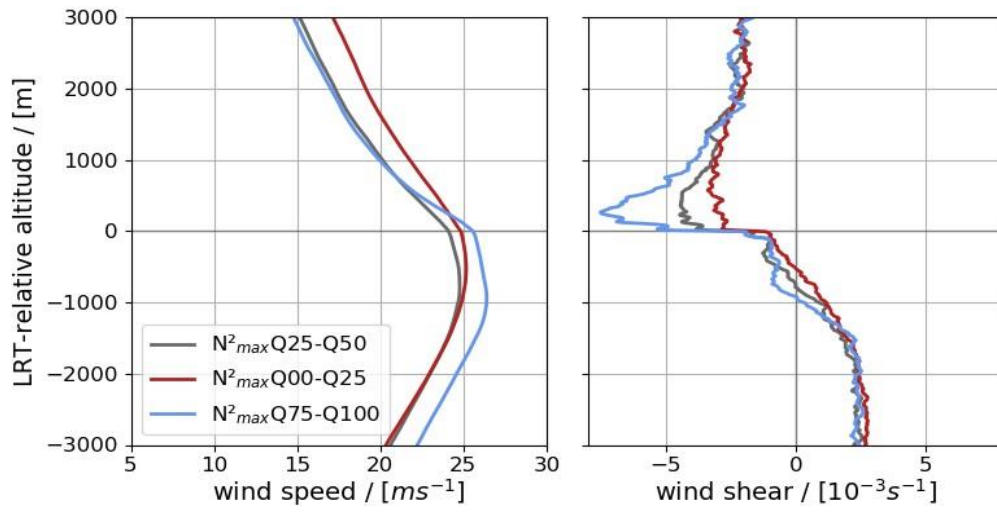

FigureS4: LRT<sub>0</sub>-relative mean profiles of (a) wind speed and (b) per classes of tropopause sharpness for mid-latitude profiles with LRT < 14 km.
